# Supplementary material for: Filtration with cornstalks as a pre-treatment process to control membrane fouling in the concentration of biogas slurry: performance, mechanism and economic analysis
Source: Royal Society of Chemistry journal article supplement (doi:10.1039/d2ew00051b), 2022-01-01
Supplement: d2ew00051b1.pdf [file d2ew00051b1.pdf]

# Supplementary Data

## **Filtration by cornstalk as pre-treatment processes to control membrane fouling in concentration of biogas slurry: Performance, Mechanism and Economic analysis**

Yun Li <sup>a,b</sup>, Shuni Xu <sup>a</sup>, Mingcan Zhao <sup>a</sup>, Yuan Song <sup>a</sup>, Zhiqi Wang <sup>a</sup>, Xiaomin Xie <sup>c\*</sup>

<sup>a</sup> College of Resources and Environmental Sciences, Qingdao Agricultural University,  
Qingdao 266109, China

<sup>b</sup> Guangdong Provincial Key Laboratory of Agricultural & Rural Pollution Abatement and  
Environmental Safety, Guangzhou 510642, China

<sup>c</sup> School of Environmental Science and Engineering, Shandong University, Qingdao 266237,  
China

---

\*Corresponding author: xiexiaomin@sdu.edu.cn.

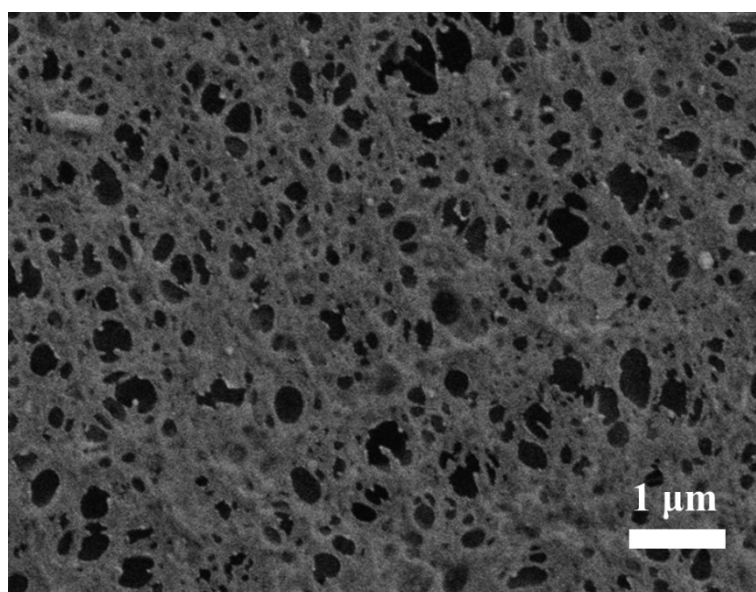

**Figure S1** SEM of the active layer of UF membrane before fouling.

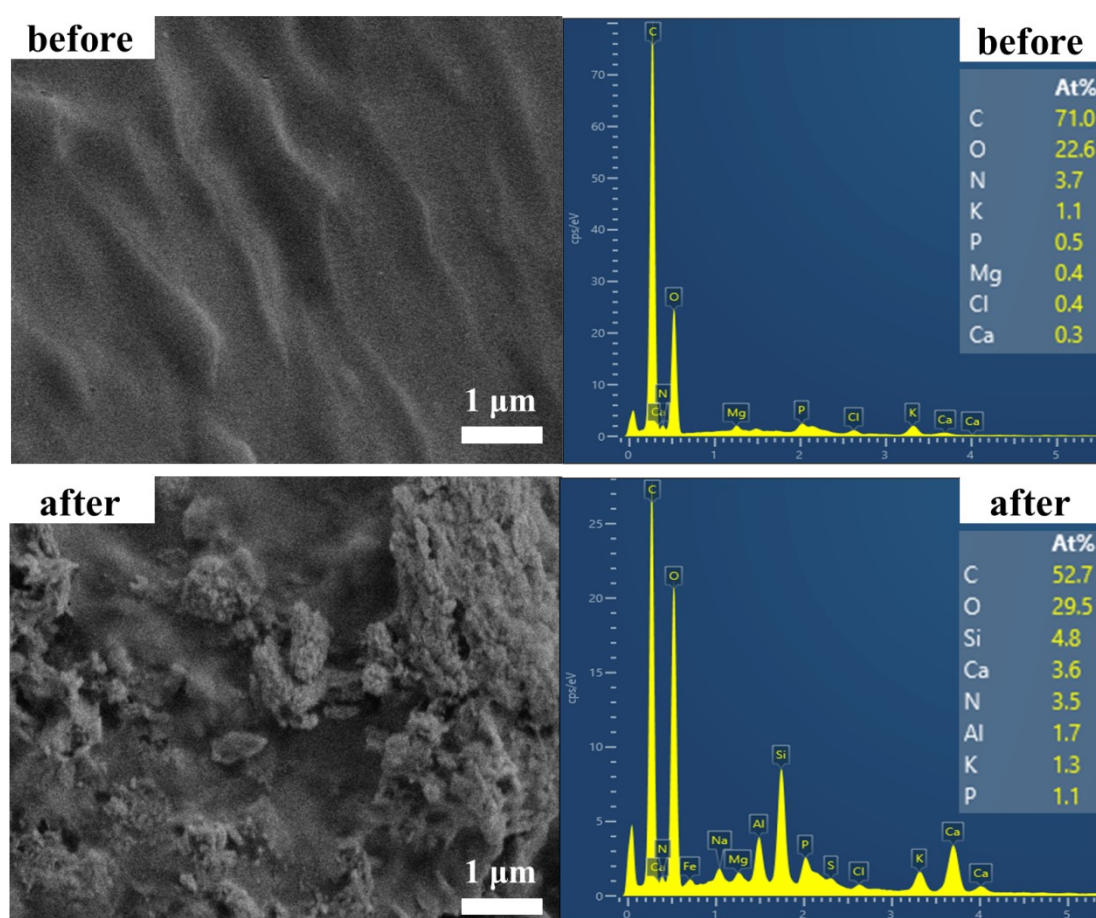

**Figure S2** SEM-EDS of the surface of cornstalk before and after filtering the biogas slurry. Cornstalk after filtration is selected in high-density filtration treatment.

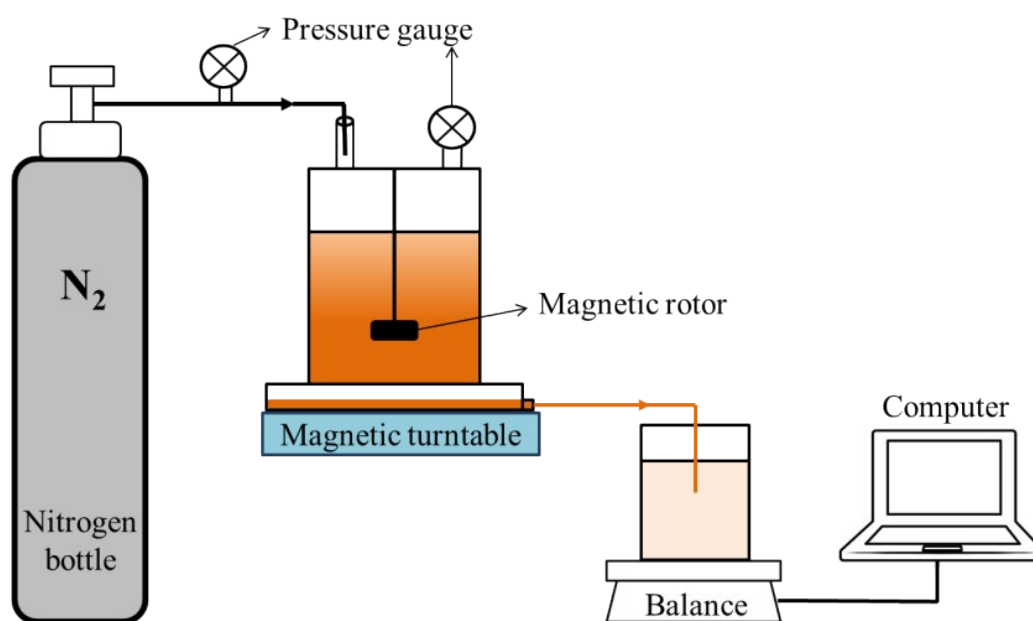

**Figure S3** Schematic diagram of the ultrafiltration cup system.

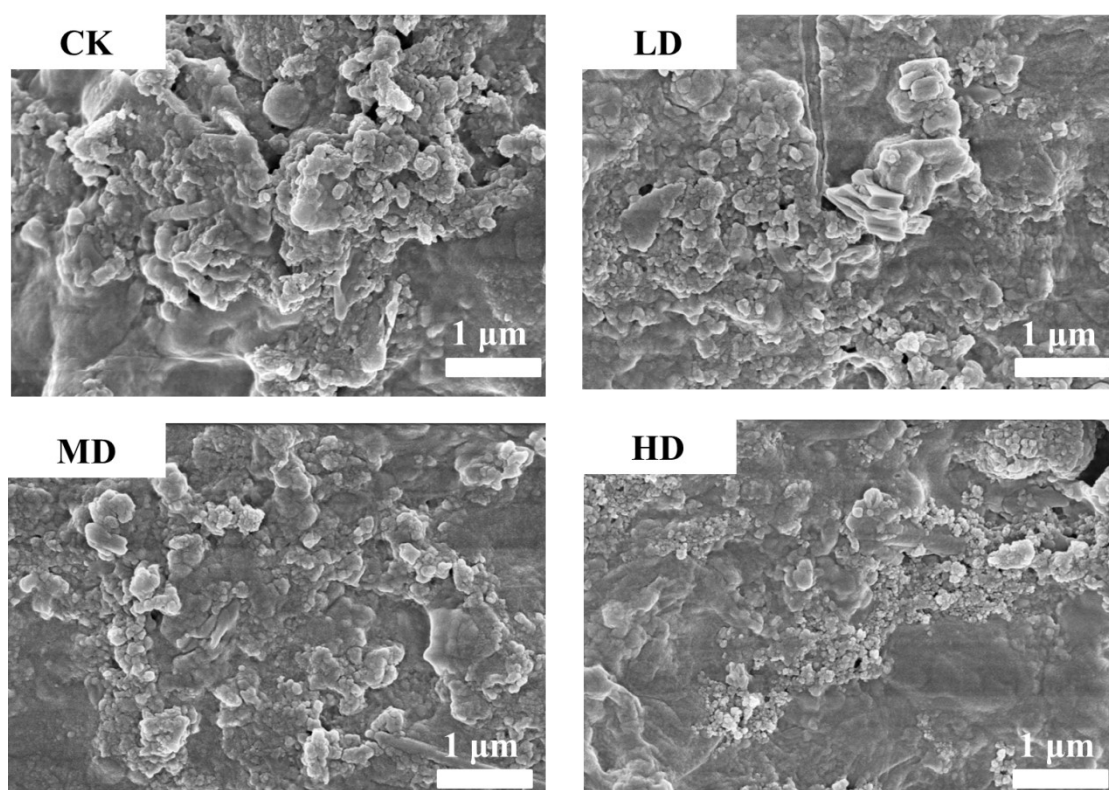

**Figure S4** SEM of the active layer of membranes after concentrating biogas slurry. CK was the direct membrane treatment of biogas slurry. LD was the membrane treatment of biogas slurry after filtration of low-density filled cornstalk. MD was the membrane treatment of biogas slurry after

filtration of medium-density filled cornstalk. HD was the membrane treatment of biogas slurry after filtration of high-density filled cornstalk.

**Table S1** Key physiochemical characteristics of biogas slurry

| Parameter                         | Biogas slurry   |
|-----------------------------------|-----------------|
| Chemical oxygen demand, COD (g/L) | $29.5 \pm 1.4$  |
| Total nitrogen, TN (g/L)          | $1.7 \pm 0.1$   |
| Total phosphorus, TP (g/L)        | $1.4 \pm 0.1$   |
| pH (-)                            | $8.76 \pm 0.08$ |
| Total solids, TS (g/L)            | $33.8 \pm 1.2$  |
| Turbidity (-)                     | $17395 \pm 715$ |

**Table S2** Equation of different fouling mechanism for filtration

| Mechanism model            | Fitting formula        |
|----------------------------|------------------------|
| complete pore blocking     | $J_0 - J = AV$         |
| standard pore blocking     | $1/t + B = J_0/V$      |
| intermediate pore blocking | $\ln J_0 - \ln J = CV$ |

The mechanism formula of the same pore plugging model is shown in Table S1, where  $J$  is the membrane flux,  $J_0$  is the initial membrane flux,  $t$  is the filtration time,  $V$  is the filtration volume,  $A$  is the complete pore plugging coefficient, and  $B$  is the standard pore plugging coefficient,  $C$  is the intermediate hole plugging coefficient.
